# Supplementary material for: Phase 2 Study of Anti-Human Cytomegalovirus Monoclonal Antibodies for Prophylaxis in Hematopoietic Cell Transplantation
Source: PubMed Central journal article supplement (PMC7179282; doi:10.1128/aac.02467-19), 2020-03-24
Supplement: AAC.02467-19-s0001.pdf [file AAC.02467-19-s0001.pdf]

# Supplemental Information

## **Assessment of human cytomegalovirus (HCMV) disease**

HCMV disease was defined according to published criteria. For pneumonia, central nervous system (CNS) disease, gastrointestinal disease, hepatitis, nephritis, cystitis, myocarditis, pancreatitis, and disease in other organs, definite tissue-invasive disease requires the correct clinical syndrome combined with the detection of HCMV in tissue samples (or in bronchoalveolar lavage fluid for pneumonia) by virus isolation, immunohistochemical analysis, in situ hybridization, or conventional histologic features. Detection of HCMV by polymerase chain reaction (PCR) alone is not sufficient. For CNS disease, detection of HCMV in cerebrospinal fluid (CSF) samples by culture or PCR is sufficient. HCMV viral syndrome requires fever (oral temperature  $>38^{\circ}\text{C}$ ) for 2 or more days within a 4-day period, neutropenia or thrombocytopenia, and the detection of HCMV in the blood by culture or the detection of antigen, DNA, or RNA. Human herpesvirus 6 infection needs to be excluded. HCMV-associated graft failure requires severe pancytopenia, bone marrow hypoplasia, and the detection of HCMV by culture in bone marrow. Graft-versus-host disease, relapse, and human herpesvirus 6 infection all need to be excluded. Probable disease requires the correct clinical syndrome but the detection of HCMV cannot be confirmed as outlined above. For retinitis, typical HCMV lesions must be confirmed by an ophthalmologist; detection of HCMV is not required.

## **Statistical methods**

Kaplan-Meier plots and the log-rank test were used to assess the time to start of preemptive therapy between the treatment groups. The duration (in days) of preemptive therapy was first averaged across administrations per patient and summarized across patients and treatment group. The difference between treatment groups was assessed using the Hodges-Lehman location test. Descriptive summaries were performed on the number of times preemptive therapy is required and on the proportion of patients developing HCMV disease. Safety endpoints were summarized using descriptive statistics. Exploratory analyses including Cochran-Mantel Hazard test to assess the effect of potential confounding factors on mortality rates adjusting for treatment were

performed on the safety analysis set. Fisher’s exact test was also performed to test the association between potential confounding factors and treatment group.

**Exclusions from analysis sets.** Eighty-six patients were randomized, received at least one dose of CSJ148 and were included in the safety analysis set and full analysis set. The combined (Cohort 1 and 2) pharmacodynamic (PD) analysis set included 64 patients, 22 patients (26%) were excluded. Among the 22 excluded patients, 14 (64%) patients were excluded for use of prohibited or rescue medications with anti-HCMV activity and did not meet the primary endpoint, 7 (32%) patients were excluded for study withdrawal or death prior to meeting the primary endpoint or Day 99 (whichever came first); and 1 (5%) patient who met the primary endpoint was excluded for missing a study drug dose prior to meeting the primary endpoint. The modified combined modified PD analysis set included 57 patients, 29 patients (34%) were excluded. Among the 29 excluded patients in the modified PD analysis set pooling Cohorts 1 and 2, 21 (72%) patients were excluded for use of prohibited or rescue medications with anti-HCMV activity, 7 (24%) were excluded for study withdrawal or death prior to meeting the primary endpoint or Day 99 (whichever came first); and 1 (3%) patient who met the primary endpoint was excluded for missing a study drug dose prior to meeting the endpoint.

**Table S1: Number (percent) of patients in the analysis sets**

Analysis set for this table: All patients

|                                          | Cohort 1               |                         | Cohort 2                 |  | Total<br>CSJ148<br>N=65<br>n (%) | Total<br>N=86<br>n (%) |
|------------------------------------------|------------------------|-------------------------|--------------------------|--|----------------------------------|------------------------|
|                                          | CSJ148<br>N=6<br>n (%) | CSJ148<br>N=59<br>n (%) | Placebo<br>N=21<br>n (%) |  |                                  |                        |
| Patients randomized                      | 6 (100.0)              | 59 (100.0)              | 21 (100.0)               |  | 65 (100.0)                       | 86 (100.0)             |
| Safety analysis and full analysis set    | 6 (100.0)              | 59 (100.0)              | 21 (100.0)               |  | 65 (100.0)                       | 86 (100.0)             |
| PK analysis set (CSJ148 only)            | 6 (100.0)              | 59 (100.0)              | NA                       |  | 65 (100.0)                       | 65 (75.6)              |
| PD analysis set (Cohort 2 only)          | NA                     | 42 (71.2)               | 17 (81.0)                |  | 42 (64.6)                        | 59 (68.6)              |
| Combined PD analysis set                 | 5 (83.3)               | 42 (71.2)               | 17 (81.0)                |  | 47 (72.3)                        | 64 (74.4)              |
| Modified PD analysis set (Cohort 2 only) | NA                     | 36 (61.0)               | 16 (76.2)                |  | 36 (55.4)                        | 52 (60.5)              |
| Combined modified PD analysis set        | 5 (83.3)               | 36 (61.0)               | 16 (76.2)                |  | 41 (63.1)                        | 57(66.3)               |

NA = not applicable; PD = pharmacodynamic; PK = pharmacokinetic

**Table S2: Incidence of adverse events >10% by preferred term - n (percent) of patients**

Analysis set for this table: Safety analysis set

| Preferred term                    | Placebo<br>N=21 |        | Total<br>CSJ148<br>N=65 |        | Total<br>N=86 |        |
|-----------------------------------|-----------------|--------|-------------------------|--------|---------------|--------|
|                                   | n               | (%)    | n                       | (%)    | n             | (%)    |
| Nausea                            | 14              | (66.7) | 46                      | (70.8) | 60            | (69.8) |
| Diarrhoea                         | 12              | (57.1) | 44                      | (67.7) | 56            | (65.1) |
| Vomiting                          | 14              | (66.7) | 38                      | (58.5) | 52            | (60.5) |
| Stomatitis                        | 15              | (71.4) | 36                      | (55.4) | 51            | (59.3) |
| Pyrexia                           | 11              | (52.4) | 38                      | (58.5) | 49            | (57.0) |
| Febrile neutropenia               | 11              | (52.4) | 29                      | (44.6) | 40            | (46.5) |
| Cough                             | 9               | (42.9) | 25                      | (38.5) | 34            | (39.5) |
| Decreased appetite                | 7               | (33.3) | 27                      | (41.5) | 34            | (39.5) |
| Rash                              | 7               | (33.3) | 24                      | (36.9) | 31            | (36.0) |
| Headache                          | 6               | (28.6) | 24                      | (36.9) | 30            | (34.9) |
| Hypertension                      | 5               | (23.8) | 23                      | (35.4) | 28            | (32.6) |
| Constipation                      | 8               | (38.1) | 19                      | (29.2) | 27            | (31.4) |
| Fatigue                           | 7               | (33.3) | 18                      | (27.7) | 25            | (29.1) |
| Hypokalaemia                      | 5               | (23.8) | 20                      | (30.8) | 25            | (29.1) |
| Back pain                         | 5               | (23.8) | 17                      | (26.2) | 22            | (25.6) |
| Pruritus                          | 4               | (19.0) | 18                      | (27.7) | 22            | (25.6) |
| Abdominal pain                    | 5               | (23.8) | 16                      | (24.6) | 21            | (24.4) |
| Insomnia                          | 6               | (28.6) | 15                      | (23.1) | 21            | (24.4) |
| Acute graft versus host disease*  | 6               | (19.0) | 28                      | (23.1) | 34            | (22.1) |
| Chills                            | 4               | (19.0) | 15                      | (23.1) | 19            | (22.1) |
| Dizziness                         | 3               | (14.3) | 16                      | (24.6) | 19            | (22.1) |
| Dry eye                           | 5               | (23.8) | 14                      | (21.5) | 19            | (22.1) |
| Dyspnoea                          | 3               | (14.3) | 13                      | (20.0) | 16            | (18.6) |
| Haemorrhoids                      | 2               | (9.5)  | 13                      | (20.0) | 15            | (17.4) |
| Oropharyngeal pain                | 3               | (14.3) | 12                      | (18.5) | 15            | (17.4) |
| Dry mouth                         | 3               | (14.3) | 11                      | (16.9) | 14            | (16.3) |
| Oedema peripheral                 | 2               | (9.5)  | 12                      | (18.5) | 14            | (16.3) |
| Arthralgia                        | 1               | (4.8)  | 12                      | (18.5) | 13            | (15.1) |
| Hypomagnesaemia                   | 4               | (19.0) | 9                       | (13.8) | 13            | (15.1) |
| Hypotension                       | 4               | (19.0) | 9                       | (13.8) | 13            | (15.1) |
| Upper respiratory tract infection | 4               | (19.0) | 9                       | (13.8) | 13            | (15.1) |
| Abdominal pain upper              | 5               | (23.8) | 7                       | (10.8) | 12            | (14.0) |
| Neutropenia                       | 5               | (23.8) | 7                       | (10.8) | 12            | (14.0) |
| Non-cardiac chest pain            | 1               | (4.8)  | 11                      | (16.9) | 12            | (14.0) |

|                                    |   |        |    |        |    |        |
|------------------------------------|---|--------|----|--------|----|--------|
| Thrombocytopenia                   | 3 | (14.3) | 9  | (13.8) | 12 | (14.0) |
| Anaemia                            | 4 | (19.0) | 7  | (10.8) | 11 | (12.8) |
| Blood creatinine increased         | 3 | (14.3) | 8  | (12.3) | 11 | (12.8) |
| Haematuria                         | 1 | (4.8)  | 10 | (15.4) | 11 | (12.8) |
| Pleural effusion                   | 1 | (4.8)  | 10 | (15.4) | 11 | (12.8) |
| Acute kidney injury                | 2 | (9.5)  | 8  | (12.3) | 10 | (11.6) |
| Bone pain                          | 1 | (4.8)  | 9  | (13.8) | 10 | (11.6) |
| Chronic graft versus host disease* | 4 | (19.0) | 10 | (9.2)  | 10 | (11.6) |
| Dry skin                           | 4 | (19.0) | 6  | (9.2)  | 10 | (11.6) |
| Dyspepsia                          | 3 | (14.3) | 7  | (10.8) | 10 | (11.6) |
| Epistaxis                          | 2 | (9.5)  | 8  | (12.3) | 10 | (11.6) |
| Oesophagitis                       | 1 | (4.8)  | 9  | (13.8) | 10 | (11.6) |
| Pneumonia                          | 1 | (4.8)  | 9  | (13.8) | 10 | (11.6) |
| Pollakiuria                        | 2 | (9.5)  | 8  | (12.3) | 10 | (11.6) |
| Tachycardia                        | 2 | (9.5)  | 8  | (12.3) | 10 | (11.6) |
| Abdominal distension               | 3 | (14.3) | 6  | (9.2)  | 9  | (10.5) |
| Alanine aminotransferase increased | 3 | (14.3) | 6  | (9.2)  | 9  | (10.5) |
| Asthenia                           | 2 | (9.5)  | 7  | (10.8) | 9  | (10.5) |
| Blood bilirubin increased          | 1 | (4.8)  | 8  | (12.3) | 9  | (10.5) |
| Folliculitis                       | 2 | (9.5)  | 7  | (10.8) | 9  | (10.5) |
| Hyperglycaemia                     | 1 | (4.8)  | 8  | (12.3) | 9  | (10.5) |
| Hypophosphataemia                  | 3 | (14.3) | 6  | (9.2)  | 9  | (10.5) |

---

\*Related preferred terms pooled

**Table S3: Overview of deaths**

Analysis set for this table: Safety analysis set

| Cause of death                                                                        | Reason for HCT /<br>Type of HCT                                                                  | Relevant medical history                                                                                                     | Study day |                               |
|---------------------------------------------------------------------------------------|--------------------------------------------------------------------------------------------------|------------------------------------------------------------------------------------------------------------------------------|-----------|-------------------------------|
|                                                                                       |                                                                                                  |                                                                                                                              | Death     | Last dose<br>of study<br>drug |
| <b>CSJ148</b>                                                                         |                                                                                                  |                                                                                                                              |           |                               |
| Fungal pneumonia<br>(mucormycosis)                                                    | Acute myeloid leukemia /<br>unrelated, matched, non-<br>myeloablative                            | 71-year-old, atypical<br>pneumonia                                                                                           | 38        | 28                            |
| Progressive respiratory<br>distress                                                   | Refractory myeloid<br>leukemia / Matched,<br>unrelated, non-<br>myeloablative                    | 71-year-old, pancytopenia,<br>atrial hypertension and<br>squamous nasal papilloma                                            | 38        | 28                            |
| Bacterial pneumonia,<br>Epstein-Barr virus<br>infection, respiratory<br>insufficiency | Acute myeloid leukemia /<br>Unrelated, matched, non-<br>myeloablative                            | 67-year-old, pneumonia<br>fungal, empty sella<br>syndrome, tobacco abuse                                                     | 78        | 57                            |
| Atypical pneumonia                                                                    | Myelodysplastic syndrome,<br>acute myeloid leukemia /<br>Related, matched, non-<br>myeloablative | 46-year-old, chronic<br>hepatitis B, toxicoderma,<br>edema of the limbs, febrile<br>neutropenia                              | 91        | 85                            |
| Acute hypoxic respiratory<br>failure                                                  | Acute myeloid leukemia /<br>Matched, unrelated,<br>myeloablative                                 | 67-year-old, right atrial<br>thrombus, elevated liver<br>enzymes, diabetes mellitus,<br>splenomegaly, anemia,<br>neutropenia | 100       | 58                            |
| Pneumonia, sepsis                                                                     | Primary central nervous<br>system lymphoma /<br>Matched, related,<br>myeloablative               | 64-year-old, hypertension                                                                                                    | 125       | 92                            |
| Relapse chronic myeloid<br>leukemia in blast crisis                                   | Chronic myeloid leukemia /<br>Related, haploidentical,<br>myeloablative                          | 45-year-old, thrombosis (left<br>vena jugularis), left eye<br>retinal mass                                                   | 141       | 85                            |
| Acute respiratory failure                                                             | Myelodysplastic syndrome /<br>Related, haploidentical,<br>non-myeloablative                      | 71-year-old, steroid-induced<br>diabetes, sleep apnea,<br>hypertension                                                       | 145       | 84                            |
| Septic shock                                                                          | Chronic neutrophilic<br>leukemia / Unrelated,<br>matched, non-<br>myeloablative                  | 66-year-old, type 2<br>diabetes, myocardial<br>infarction,<br>hypercholesterolemia,<br>hypertension                          | 157       | 84                            |
| Sepsis                                                                                | Myelodysplastic syndrome /<br>Non-related, non-<br>myeloablative                                 | 61-year-old,<br>hypothyroidism,<br>hypertension                                                                              | 164       | 84                            |
| Acute graft-versus-host<br>disease skin, thrombotic<br>thrombocytopenic purpura       | Acute lymphoblastic<br>leukemia / Related,<br>haploidentical, non-<br>myeloablative              | 47-year-old, fungal<br>pneumonia, recurrent<br>cytopenias, nephrolithiasis,<br>hepatitis B virus carrier                     | 166       | 85                            |
| Sepsis, relapsed acute<br>myeloid leukemia                                            | Acute myeloid leukemia /<br>Matched, unrelated, non-<br>myeloablative                            | 59-year-old, type 2 diabetes<br>mellitus, hypertension                                                                       | 159       | 8                             |

|                                                                |                                                                             |                                                                                                                                                    |     |    |
|----------------------------------------------------------------|-----------------------------------------------------------------------------|----------------------------------------------------------------------------------------------------------------------------------------------------|-----|----|
| Gastrointestinal bleeding                                      | Natural killer T-cell lymphoma / Related, haploidentical, non-myeloablative | 31-year-old, elevated transaminases, sinusitis                                                                                                     | 193 | 86 |
| Acute graft-versus-host disease                                | Diffuse large B-cell lymphoma / Matched, unrelated, non-myeloablative       | 39-year-old, hypertension, seizure disorder, acute on chronic kidney disease, common variable immunodeficiency, hemolytic anemia                   | 200 | 56 |
| Acute myeloid leukemia relapse                                 | Acute myeloid leukemia / Matched, related, non-myeloablative                | 68-year-old, hyperlipidemia, asthma, deep vein thrombosis                                                                                          | 203 | 85 |
| Gastrointestinal haemorrhage, acute renal failure              | Acute myeloid leukemia / allogenic, related, non-myeloablative              | 57-year-old, chronic hepatitis B, fungal pneumonia, bacteremia                                                                                     | 210 | 85 |
| <i>E. coli</i> bacteremia, sepsis                              | Progressive non-Hodgkin lymphoma / Matched, unrelated, non-myeloablative    | 60-year-old, diabetes mellitus, urolithiasis, interstitial pneumonia, acute renal insufficiency, elevated aspartate and alanine aminotransaminases | 213 | 84 |
| Acute myeloid leukemia relapse                                 | Acute myeloid leukemia / Matched, non-related, non-myeloablative            | 60-year-old, hypertension, systemic inflammatory response syndrome, and pulmonary embolism                                                         | 221 | 86 |
| Respiratory distress, relapsed chronic myelomonocytic leukemia | Chronic myelomonocytic leukemia / matched, unrelated, non-myeloablative     | 54-year-old, dyspnea on exertion, febrile neutropenia, hepatosplenomegaly, splenic infarction, chronic complex periodontitis                       | 222 | 85 |
| <b>Placebo</b>                                                 |                                                                             |                                                                                                                                                    |     |    |
| Febrile neutropenia                                            | Acute myeloid leukemia / Related, haploidentical, non-myeloablative         | 22-year-old, fungal pneumonia, septic shock, human cytomegalovirus viremia                                                                         | 146 | 57 |
| Intracranial haemorrhage                                       | Acute myeloid leukemia / Related, haploidentical, non-myeloablative         | 55-year-old, Sjögren's disease, latent tuberculosis infection, hypertension, transient ischemic attack                                             | 158 | 58 |
| Acute graft-versus-host disease gut and liver                  | Acute myeloid leukemia / Related, haploidentical, myeloablative             | 51-year-old, hypothyroidism                                                                                                                        | 222 | 85 |

---

HCT = hematopoietic cell transplantation
